# Supplementary material for: Predicting hospitalizations related to ambulatory care sensitive conditions with machine learning for population health planning: derivation and validation cohort study
Source: bioRxiv or medRxiv preprint supplement (doi:10.1101/2021.02.24.21252324), 2021-02-26
Supplement: Supplementary file [file media-4.pdf]

| Feature Name                                                      | Dataset   | Description                                                                                                                                                                                                                    |
|-------------------------------------------------------------------|-----------|--------------------------------------------------------------------------------------------------------------------------------------------------------------------------------------------------------------------------------|
| Age                                                               | RPDB      | Age of the patient at the end of the observation window                                                                                                                                                                        |
| Sex (female)                                                      | RPDB      | Sex of the patient (binary)                                                                                                                                                                                                    |
| Quarter of the year                                               | -         | Quarter of the year at the end of the observation window.                                                                                                                                                                      |
| LHIN (1-14)                                                       | ON-MARG   | Local Health Integrated Network the patient lives in. Takes on a binary value for each LHIN from 1 to 14. (14 features in total)                                                                                               |
| Living in rural areas                                             | ON-MARG   | Binary indicator of whether or not a patient lives in a rural area.                                                                                                                                                            |
| Marginalization Index - Dependency (1st quintile - 5th quintile)  | ON-MARG   | Index to quantify the dependency level of the neighborhood the patient lives in. Takes on a binary value for each index level from 1 to 5. Higher index indicates lower degree of marginalization. (5 features in total)       |
| Marginalization Index - Ethnicity (1st quintile - 5th quintile)   | ON-MARG   | Index to quantify the ethnic marginalization of the neighborhood the patient lives in. Takes on a binary value for each index level from 1 to 5. Higher index indicates lower degree of marginalization. (5 features in total) |
| Marginalization Index - Instability (1st quintile - 5th quintile) | ON-MARG   | Index to quantify the instability level of the neighborhood the patient lives in. Takes on a binary value for each index level from 1 to 5. Higher index indicates lower degree of marginalization. (5 features in total)      |
| Marginalization Index - Deprivation (1st quintile - 5th quintile) | ON-MARG   | Index to quantify the deprivation level of the neighborhood the patient lives in. Takes on a binary value for each index level from 1 to 5. Higher index indicates lower degree of marginalization. (5 features in total)      |
| Income (1st quintile - 5th quintile)                              | ON-MARG   | Index to quantify the income level of the neighborhood the patient lives in. Takes on a binary value for each index level from 1 to 5. Higher index indicates higher income. (5 features in total)                             |
| Education (1st quintile - 5th quintile)                           | ON-MARG   | Index to quantify the education level of the neighborhood the patient lives in. Takes on a binary value for each index level from 1 to 5. Higher index indicates higher education level. (5 features in total)                 |
| Latitude                                                          | ON-MARG   | Value in decimal degrees to a precision of 2 decimal places ( $\sim 1km$ ).                                                                                                                                                    |
| Longitude                                                         | ON-MARG   | Value in decimal degrees to a precision of 2 decimal places ( $\sim 1km$ ).                                                                                                                                                    |
| Presence of arrhythmia                                            | MMB Macro | Presence of arrhythmia throughout the observation window.                                                                                                                                                                      |
| Presence of asthma                                                | MMB Macro | Presence of asthma throughout the observation window.                                                                                                                                                                          |
| Presence of asthma since quarter 7                                | MMB Macro | Presence of asthma starting from the 7th quarter of the observation window (at the latest).                                                                                                                                    |

| Feature Name                                      | Dataset   | Description                                                                                                |
|---------------------------------------------------|-----------|------------------------------------------------------------------------------------------------------------|
| Presence of chronic heart failure                 | MMB Macro | Presence of chronic heart failure throughout the observation window.                                       |
| Presence of chronic heart failure since quarter 1 | MMB Macro | Presence of chronic heart failure starting from the 1st quarter of the observation window (at the latest). |
| Presence of chronic heart failure since quarter 7 | MMB Macro | Presence of chronic heart failure starting from the 7th quarter of the observation window (at the latest). |
| Presence of COPD                                  | MMB Macro | Presence of chronic obstructive pulmonary disease throughout the observation window.                       |
| Presence of COPD since quarter 1                  | MMB Macro | Presence of COPD starting from the 1st quarter of the observation window (at the latest).                  |
| Presence of COPD since quarter 3                  | MMB Macro | Presence of COPD starting from the 3rd quarter of the observation window (at the latest).                  |
| Presence of COPD since quarter 4                  | MMB Macro | Presence of COPD starting from the 4th quarter of the observation window (at the latest).                  |
| Presence of COPD since quarter 5                  | MMB Macro | Presence of COPD starting from the 5th quarter of the observation window (at the latest).                  |
| Presence of COPD since quarter 6                  | MMB Macro | Presence of COPD starting from the 6th quarter of the observation window (at the latest).                  |
| Presence of COPD since quarter 7                  | MMB Macro | Presence of COPD starting from the 7th quarter of the observation window (at the latest).                  |
| Presence of coronary disease                      | MMB Macro | Presence of coronary disease throughout the observation window.                                            |
| Presence of coronary disease since quarter 1      | MMB Macro | Presence of coronary disease starting from the 1st quarter of the observation window (at the latest).      |
| Presence of coronary disease since quarter 2      | MMB Macro | Presence of coronary disease starting from the 2nd quarter of the observation window (at the latest).      |
| Presence of coronary disease since quarter 7      | MMB Macro | Presence of coronary disease starting from the 7th quarter of the observation window (at the latest).      |
| Presence of diabetes                              | MMB Macro | Presence of diabetes throughout the observation window.                                                    |
| Presence of diabetes since quarter 1              | MMB Macro | Presence of diabetes starting from the 1st quarter of the observation window (at the latest).              |
| Presence of diabetes since quarter 2              | MMB Macro | Presence of diabetes starting from the 2nd quarter of the observation window (at the latest).              |
| Presence of diabetes since quarter 3              | MMB Macro | Presence of diabetes starting from the 3rd quarter of the observation window (at the latest).              |
| Presence of diabetes since quarter 4              | MMB Macro | Presence of diabetes starting from the 4th quarter of the observation window (at the latest).              |
| Presence of diabetes since quarter 5              | MMB Macro | Presence of diabetes starting from the 5th quarter of the observation window (at the latest).              |
| Presence of diabetes since quarter 7              | MMB Macro | Presence of diabetes starting from the 7th quarter of the observation window (at the latest).              |
| Presence of hypertension                          | MMB Macro | Presence of hypertension throughout the observation window.                                                |
| Presence of hypertension since quarter 7          | MMB Macro | Presence of hypertension starting from the 7th quarter of the observation window (at the latest).          |

| Feature Name                                                      | Dataset    | Description                                                                                               |
|-------------------------------------------------------------------|------------|-----------------------------------------------------------------------------------------------------------|
| Presence of mental disease                                        | MMB Macro  | Presence of mental disease throughout the observation window.                                             |
| Presence of mental disease since quarter 1                        | MMB Macro  | Presence of mental disease starting from the 1st quarter of the observation window (at the latest).       |
| Presence of mental disease since quarter 7                        | MMB Macro  | Presence of mental disease starting from the 7th quarter of the observation window (at the latest).       |
| Presence of mood disorder                                         | MMB Macro  | Presence of mood disorder throughout the observation window.                                              |
| Presence of renal failure                                         | MMB Macro  | Presence of renal failure throughout the observation window.                                              |
| Presence of stroke since quarter 1                                | MMB Macro  | Presence of stroke starting from the 1st quarter of the observation window (at the latest).               |
| Number of ambulatory usage                                        | NACRS      | Number of ambulatory usage of the patient over the observation window                                     |
| Time since last ambulatory usage                                  | NACRS      | If there is, time since the last ambulatory usage of the patient over the observation window              |
| Presence of ACSC hospitalization                                  | DAD, NACRS | Binary indicator of the presence of any ACSC-related hospitalization over the observation window          |
| Time since last ACSC                                              | DAD, NACRS | If there is, time since the last ACSC-related hospitalization over the observation window                 |
| Number of clinician visits                                        | OHIP       | Number of clinician visits of the patient over the observation window                                     |
| Number of selective beta2-adrenergic agonists prescriptions       | ODB        | Number of selective beta2-adrenergic agonists prescriptions over the observation window                   |
| Time since last selective beta2-adrenergic agonists prescriptions | ODB        | If there is, time since last selective beta2-adrenergic agonists prescription over the observation window |
| Number of beta-blockers prescriptions                             | ODB        | Number of beta-blockers prescriptions over the observation window                                         |
| Time since last beta-blockers prescriptions                       | ODB        | If there is, time since last beta-blockers prescription over the observation window                       |
| Number of furosemide prescriptions                                | ODB        | Number of furosemide prescriptions over the observation window                                            |
| Number of albuterol sulfate prescriptions                         | ODB        | Number of albuterol sulfate prescriptions over the observation window                                     |
| Number of antilipemic statins prescriptions in quarter 8          | ODB        | Number of antilipemic statins prescriptions in the 8th quarter of the observation window                  |
| Time since last lab test                                          | OLIS       | If there is, time since last lab test the patient had over the observation window                         |
| Absence of LTC prescriptions in quarter 1                         | ODB        | Binary indicator of LTC prescriptions over the first quarter of the observation window                    |
| Clinician visit feecode in quarter 8 - chest radiology            | OHIP       | Number of clinician visits related to chest radiology in the 8th quarter of the observation window        |
| Number of calcium blockers prescriptions                          | ODB        | Number of calcium blockers prescriptions over the observation window                                      |

| Feature Name                                             | Dataset | Description                                                                                                        |
|----------------------------------------------------------|---------|--------------------------------------------------------------------------------------------------------------------|
| Number of lab tests                                      | OLIS    | Total number lab tests the patient had over the observation window                                                 |
| Number of hospitalizations                               | DAD     | Total number of hospitalizations the patient had over the observation window                                       |
| Clinician visit location in quarter 4 - office           | OHIP    | Number of visits to a clinician in office during the 4th quarter of the observation window                         |
| Number of antilipemic statins prescriptions in quarter 5 | ODB     | Number of antilipemic statins prescriptions in the 5th quarter of the observation window                           |
| Absence of LTC prescriptions in quarter 5                | ODB     | Binary indicator of LTC prescriptions over the 5th quarter of the observation window                               |
| Absence of LTC prescriptions in quarter 6                | ODB     | Binary indicator of LTC prescriptions over the 6th quarter of the observation window                               |
| Absence of LTC prescriptions in quarter 8                | ODB     | Binary indicator of LTC prescriptions over the 8th quarter of the observation window                               |
| Number of antilipemic statins prescriptions in quarter 7 | ODB     | Number of antilipemic statins prescriptions in the 7th quarter of the observation window                           |
| Time since last furosemide prescription                  | ODB     | If there is, the last time the patient was prescribed with furosemide during the observation window                |
| Clinician visit feecode in quarter 7 - chest radiology   | OHIP    | Number of clinician visits related to chest radiology in the 7th quarter of the observation window                 |
| Clinician visit feecode in quarter 6 - chest radiology   | OHIP    | Number of clinician visits related to chest radiology in the 6th quarter of the observation window                 |
| Clinician visit feecode in quarter 5 - chest radiology   | OHIP    | Number of clinician visits related to chest radiology in the 5th quarter of the observation window                 |
| Time since last albuterol sulfate prescription           | ODB     | If there is, the last time the patient was prescribed with albuterol sulfate during the observation window         |
| Number of macrolides prescriptions                       | ODB     | Number of macrolides prescriptions over the observation window                                                     |
| Time since last calcium blocker prescription             | ODB     | If there is, the last time the patient was prescribed with calcium blocker during the observation window           |
| Clinician visit feecode in quarter 4 - chest radiology   | OHIP    | Number of clinician visits related to chest radiology in the 4th quarter of the observation window                 |
| Clinician visit feecode in quarter 2 - chest radiology   | OHIP    | Number of clinician visits related to chest radiology in the 2nd quarter of the observation window                 |
| Clinician visit location in quarter 2 - office           | OHIP    | Number of visits to a clinician in office during the 2nd quarter of the observation window                         |
| Clinician visit feecode in quarter 1 - chest radiology   | OHIP    | Number of clinician visits related to chest radiology in the 1st quarter of the observation window                 |
| Clinician specialty in quarter 8 - emergency medicine    | OHIP    | Number of visits to a clinician specialized in emergency medicine during the 8th quarter of the observation window |
| Number of non-steroidal anti-inflammatory prescriptions  | ODB     | Number of non-steroidal anti-inflammatory prescriptions during the observation window                              |
| Time since last antilipemic statins prescription         | ODB     | If there is, the last time the patient was prescribed with antilipemic statins during the observation window       |

| Feature Name                                              | Dataset    | Description                                                                                                        |
|-----------------------------------------------------------|------------|--------------------------------------------------------------------------------------------------------------------|
| Emergency visit in quarter 8 - no blood transfusion       | NACRS      | No blood transfusion during emergency visits in the 8th quarter during the observation window                      |
| Time since last clinician visit                           | OHIP       | If there is, the last time the patient goes for a clinician visit over the observation window                      |
| Number of antilipemic statins prescriptions in quarter 6  | ODB        | Number of antilipemic statins prescriptions in the 6th quarter of the observation window                           |
| Clinician visit location in quarter 6 - office            | OHIP       | Number of visits to a clinician in office during the 6th quarter of the observation window                         |
| Clinician specialty in quarter 7 - emergency medicine     | OHIP       | Number of visits to a clinician specialized in emergency medicine during the 7th quarter of the observation window |
| Clinician visit location in quarter 5 - office            | OHIP       | Number of visits to a clinician in office during the 5th quarter of the observation window                         |
| Presence of COPD-related ACSC                             | DAD, NACRS | Binary indicator of the presence of any COPD ACSC-related hospitalization over the observation window              |
| Number of benzodiazepine prescriptions                    | ODB        | Number of benzodiazepine prescriptions over the observation window                                                 |
| Number of fluoroquinolones prescriptions                  | ODB        | Number of fluoroquinolones prescriptions over the observation window                                               |
| Number of antilipemic statins prescriptions in quarter 3  | ODB        | Number of antilipemic statins prescriptions in the 3rd quarter of the observation window                           |
| Number of antilipemic statins prescriptions in quarter 1  | ODB        | Number of antilipemic statins prescriptions in the 1st quarter of the observation window                           |
| Clinician specialty in quarter 3 - internal medicine      | OHIP       | Number of visits to a clinician specialized in internal medicine during the 3rd quarter of the observation window  |
| Time since last fluoroquinolones prescriptions            | ODB        | If there is, time since last fluoroquinolones prescription over the observation window                             |
| Clinician visit feecode in quarter 3 - chest radiology    | OHIP       | Number of clinician visits related to chest radiology in the 3rd quarter of the observation window                 |
| Time since last narcotics (opiate agonists) prescriptions | ODB        | If there is, time since last narcotics (opiate agonists) prescription over the observation window                  |
| Time since last ACE inhibitors prescriptions              | ODB        | If there is, time since last ACE inhibitors prescription over the observation window                               |
| Number of ACE inhibitors prescriptions                    | ODB        | Number of ACE inhibitors prescriptions over the observation window                                                 |
| Number of narcotics (opiate agonists) prescriptions       | ODB        | Number of narcotics (opiate agonists) prescriptions over the observation window                                    |
| Clinician specialty in quarter 7 - dermatology            | OHIP       | Number of visits to a clinician specialized in dermatology during the 7th quarter of the observation window        |
| Clinician specialty in quarter 6 - emergency medicine     | OHIP       | Number of visits to a clinician specialized in emergency medicine during the 6th quarter of the observation window |

**Table S4.** List of all features used in the XGBoost model and Linear Regression.
